# Supplementary material for: Early 21st century snow cover state over the western river basins of the Indus River system
Source: Copernicus journal article supplement (doi:10.5194/hess-18-4077-2014), 2014-10-15
Supplement: Supplementary file 1 [file hess-18-4077-2014-supplement.zip]

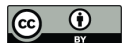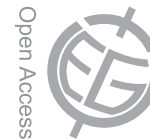

## *Supplement of*

# **Early 21st century snow cover state over the western river basins of the Indus River system**

**S. Hasson et al.**

*Correspondence to:* S. Hasson (shabeh.hasson@zmaw.de)

- Supplement-Cover-Letter.pdf
- Supplementary material.docx
